# Supplementary material for: Terminal acceptor engineering for reduced energy dissipation and enhanced charge transport in benzodithiophene-core based donor molecules: a computational route to efficient organic solar cells
Source: Royal Society of Chemistry journal article supplement (doi:10.1039/d5na01002k), 2026-04-23

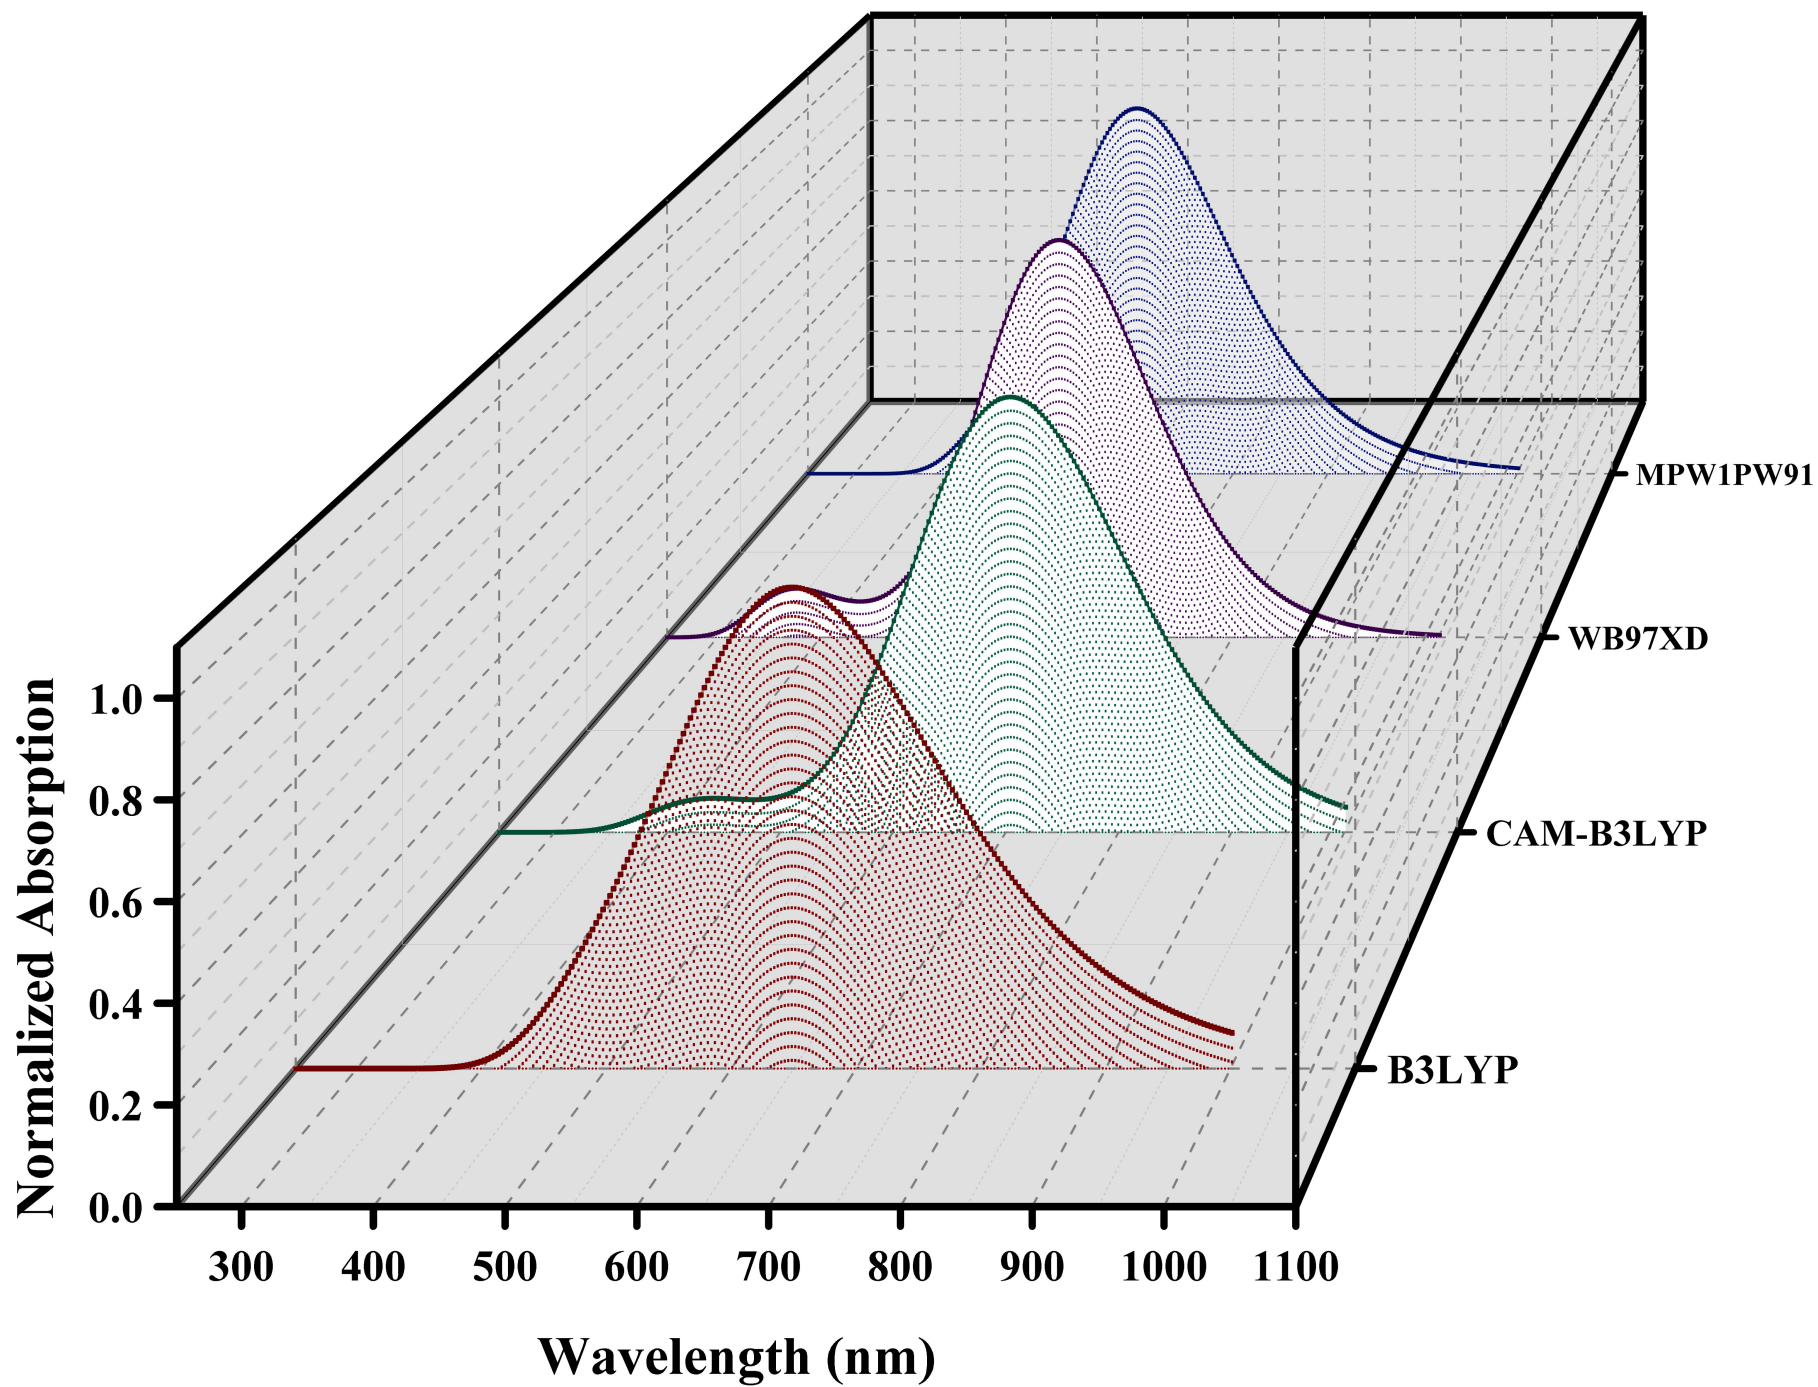

Supplement: d5na01002k3.pdf [file d5na01002k3.pdf]
