# Supplementary material for: Terminal acceptor engineering for reduced energy dissipation and enhanced charge transport in benzodithiophene-core based donor molecules: a computational route to efficient organic solar cells
Source: Royal Society of Chemistry journal article supplement (doi:10.1039/d5na01002k), 2026-04-23

**SM-R**

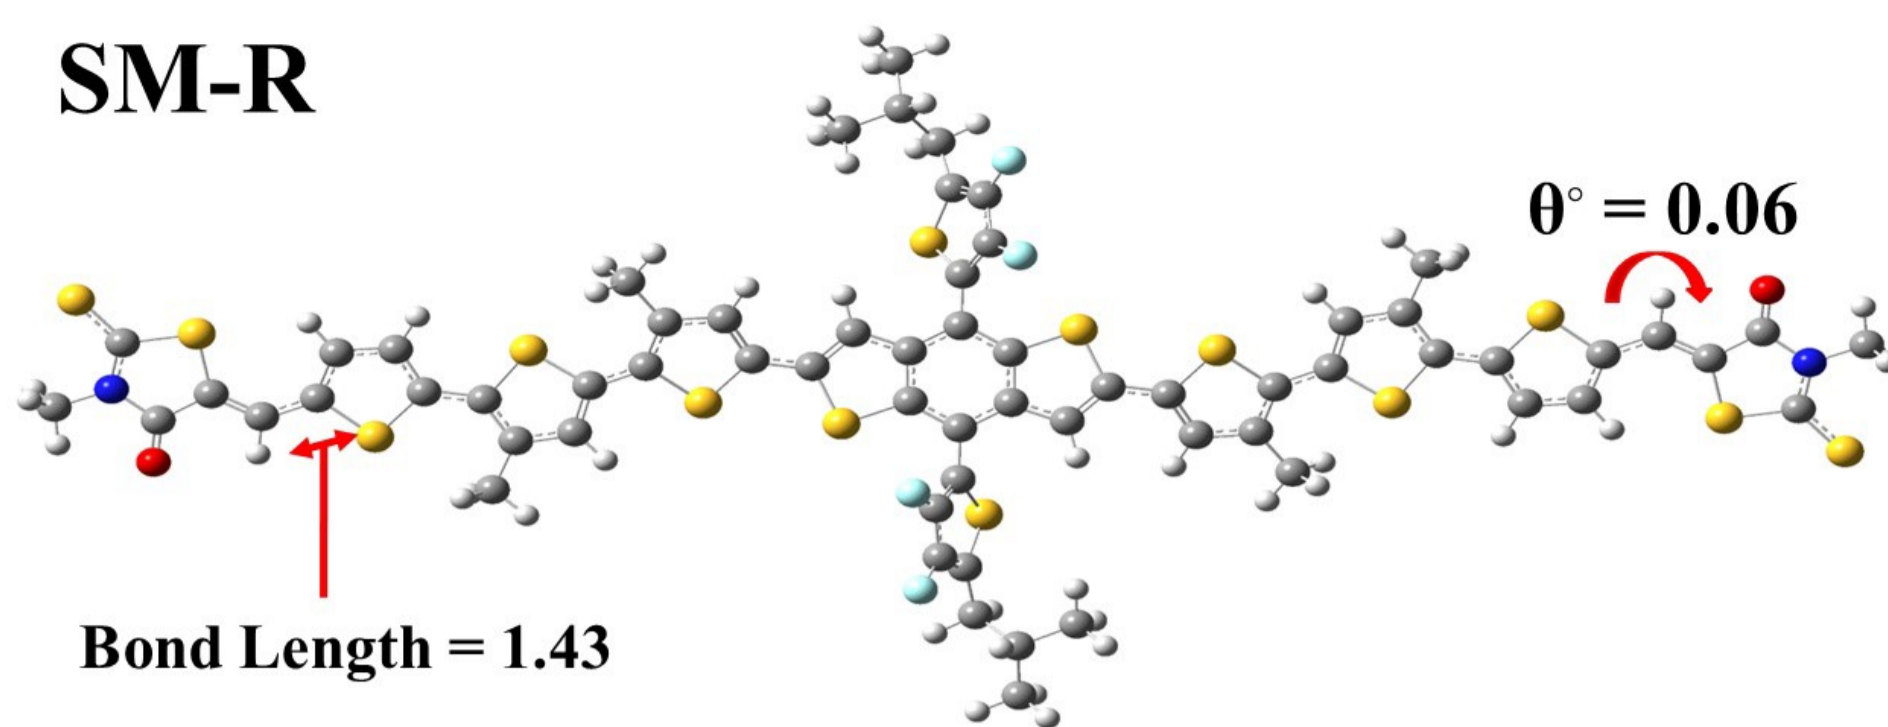

**SM-A1**

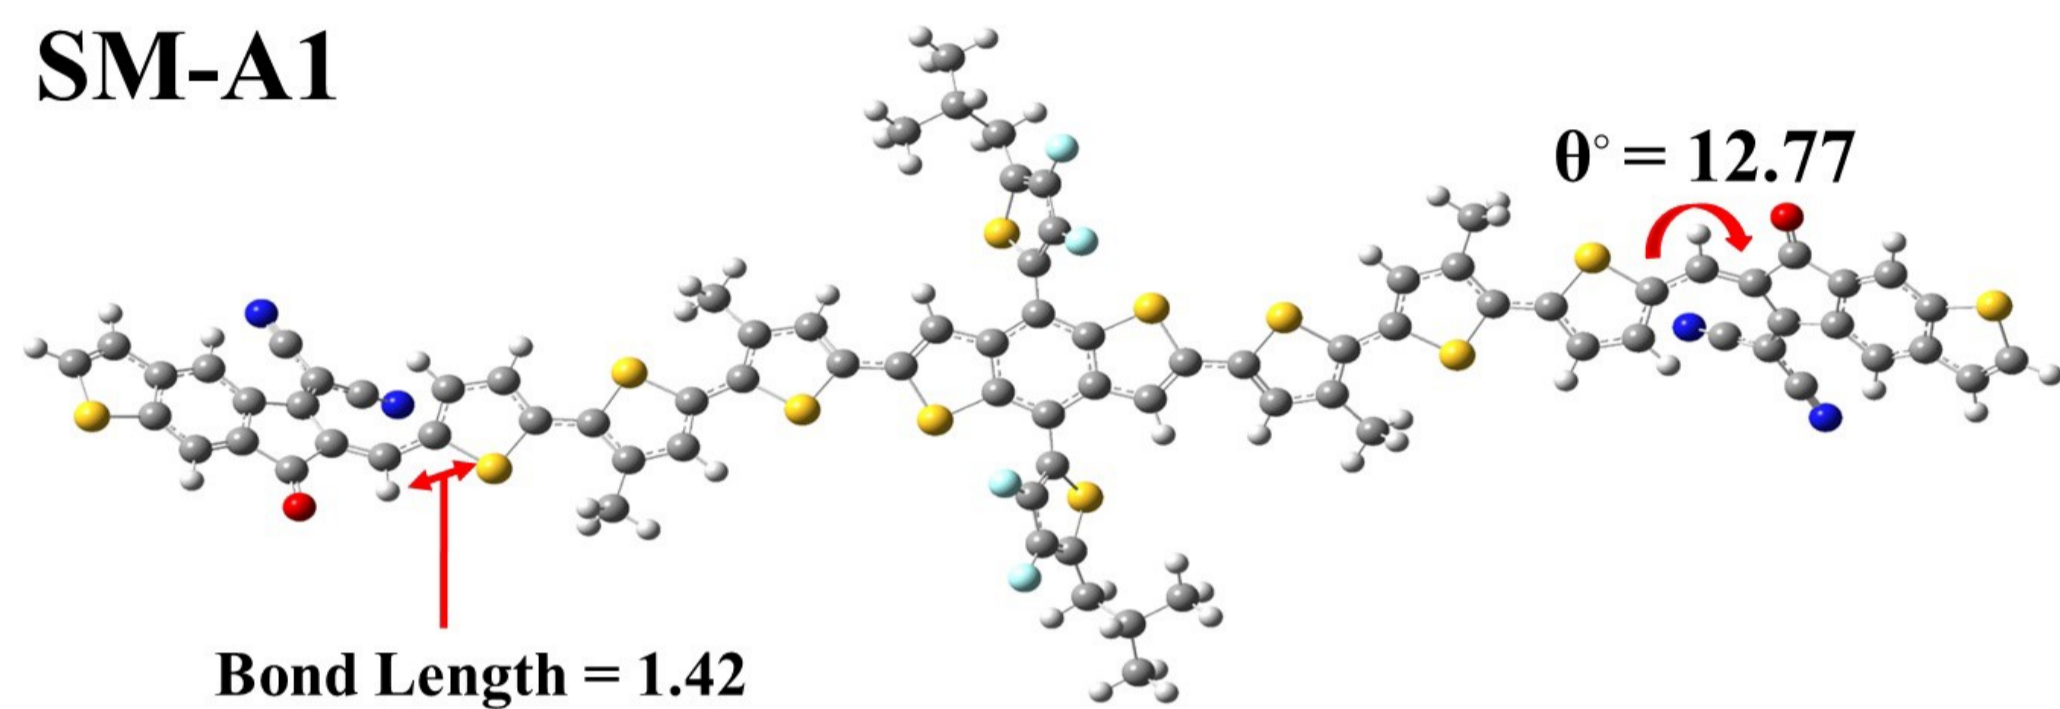

**SM-A2**

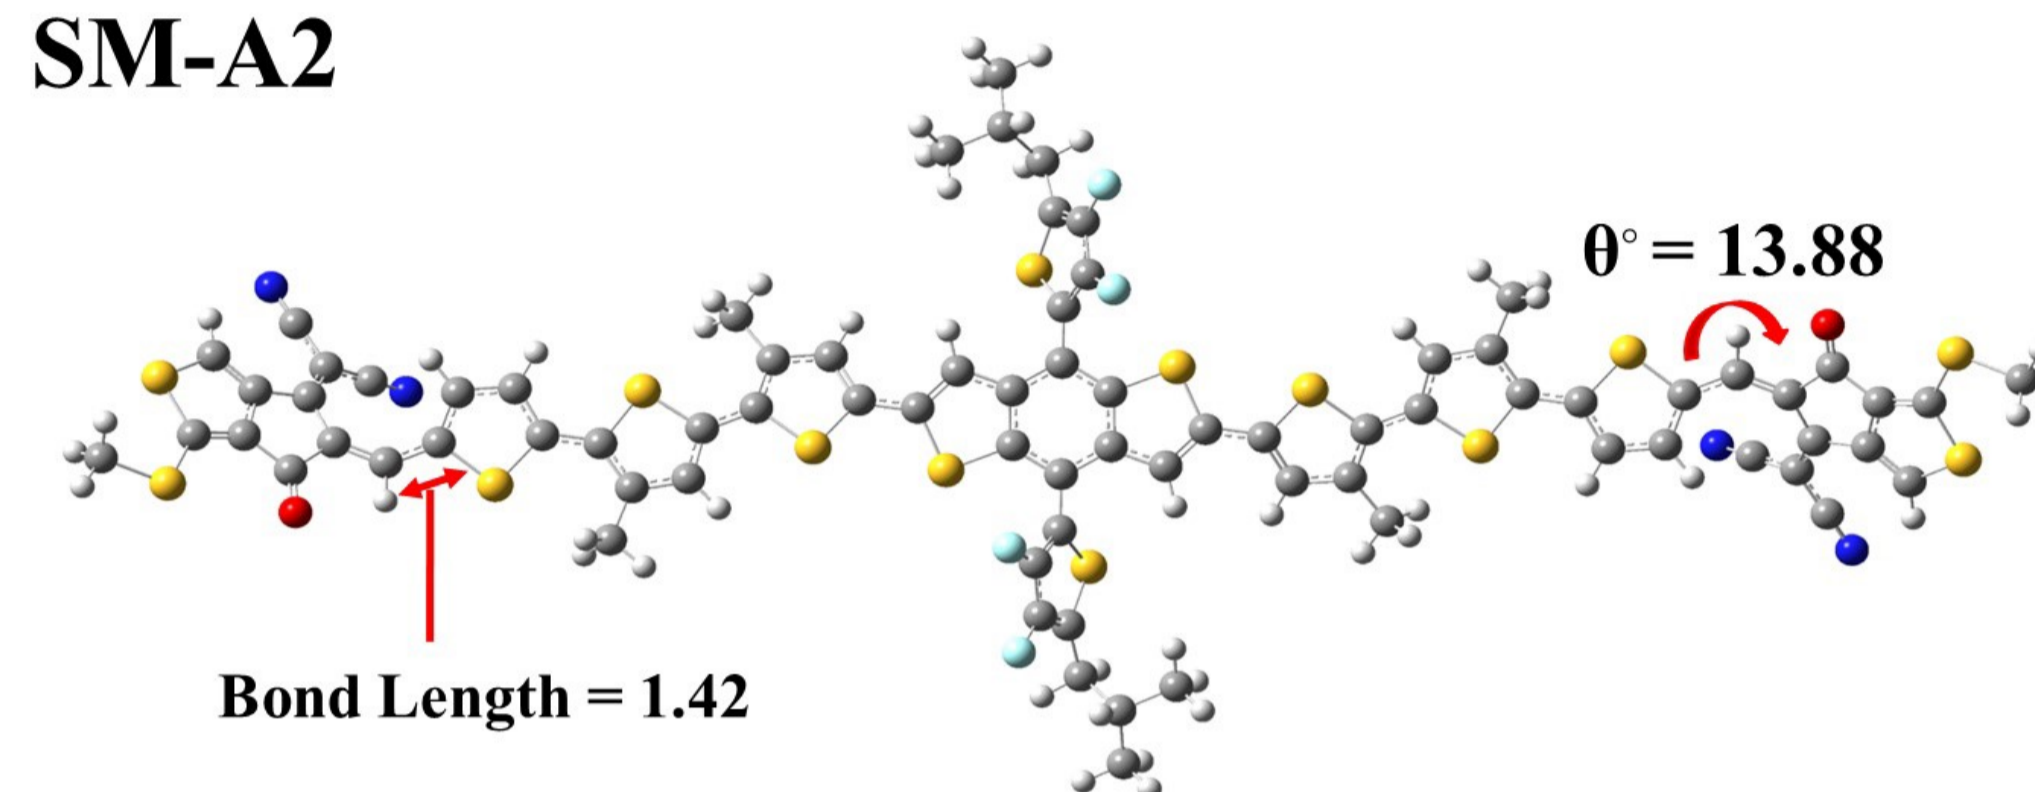

**SM-A3**

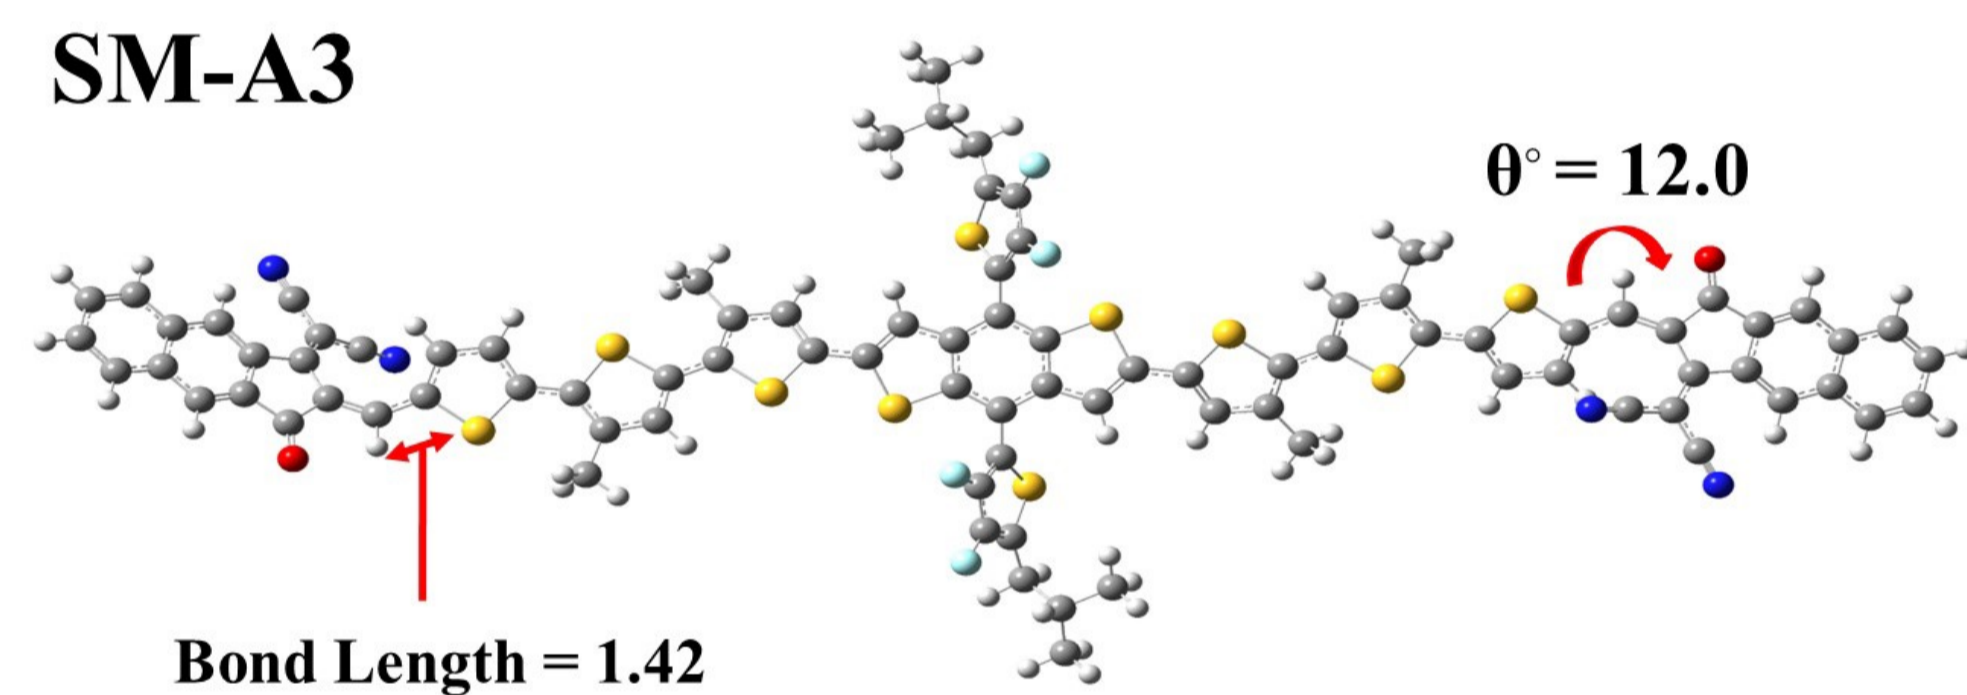

**SM-A4**

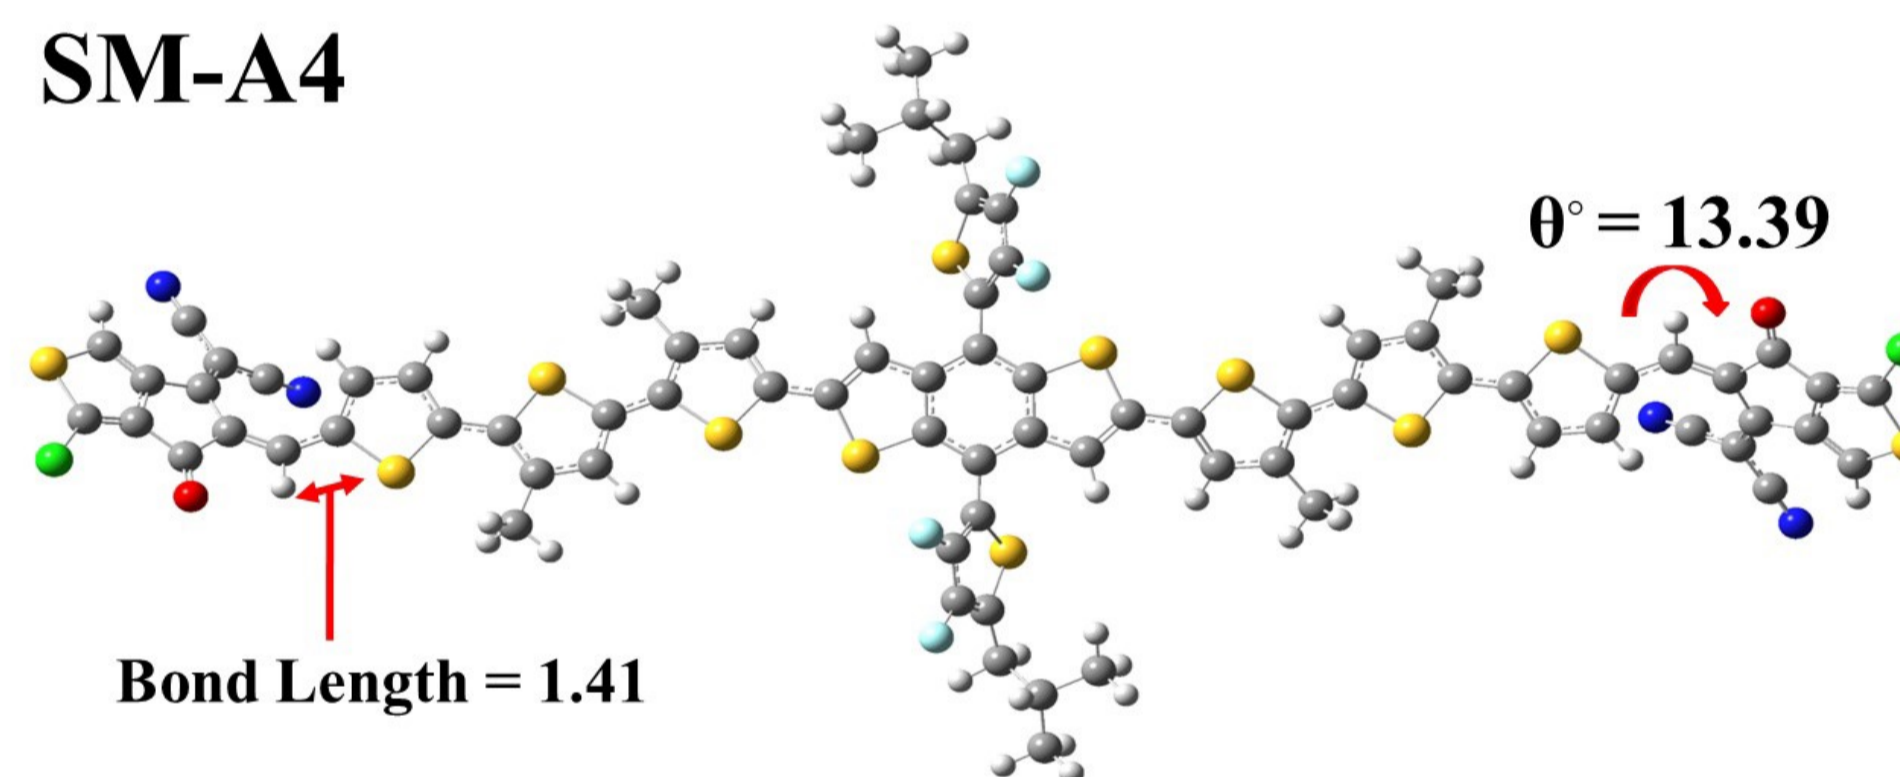

**SM-A5**

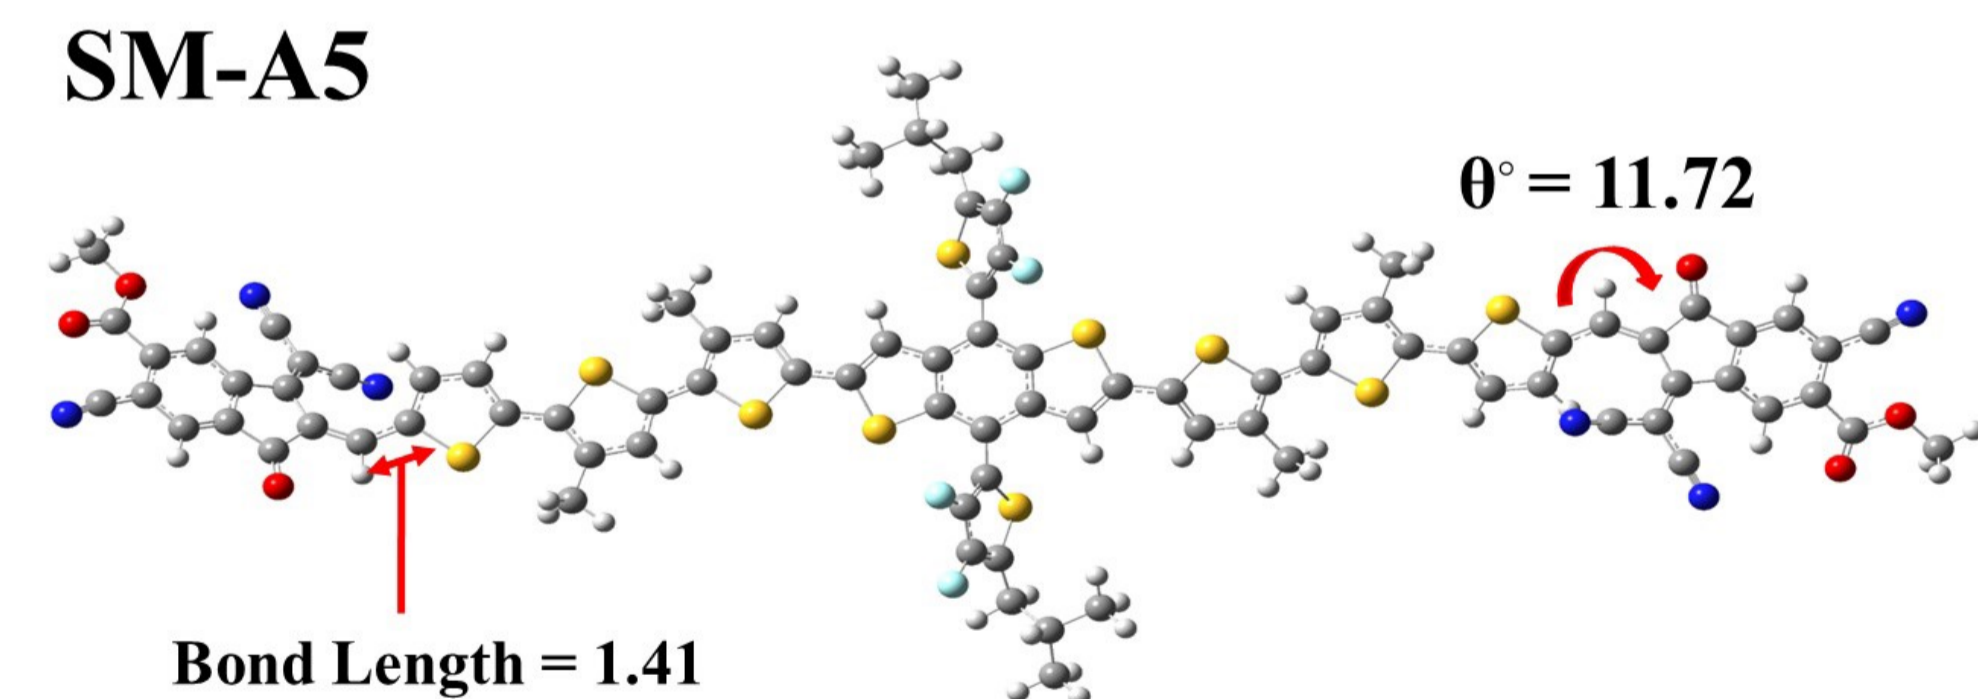

**SM-A6**

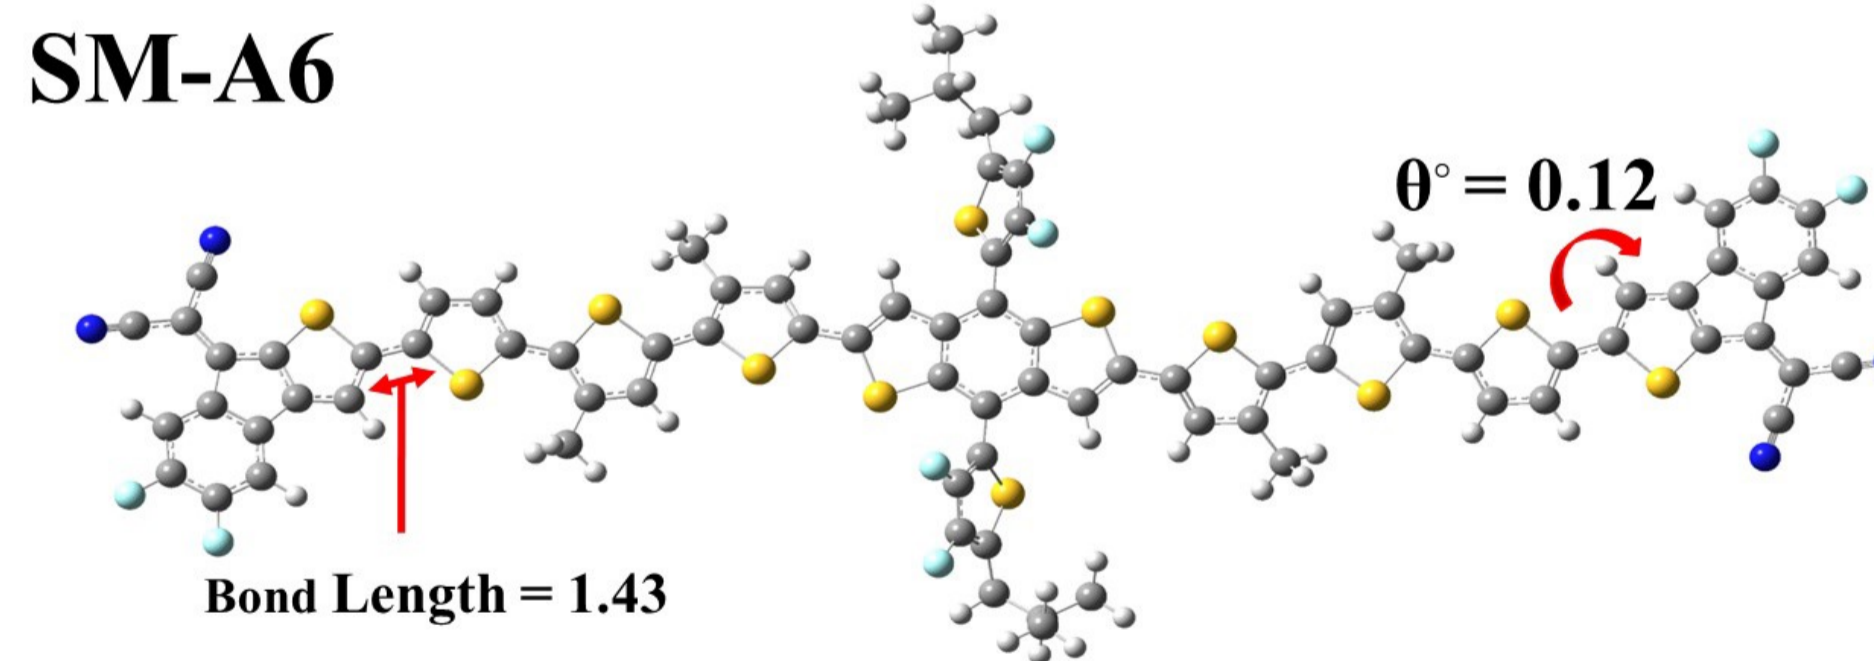

**SM-A7**

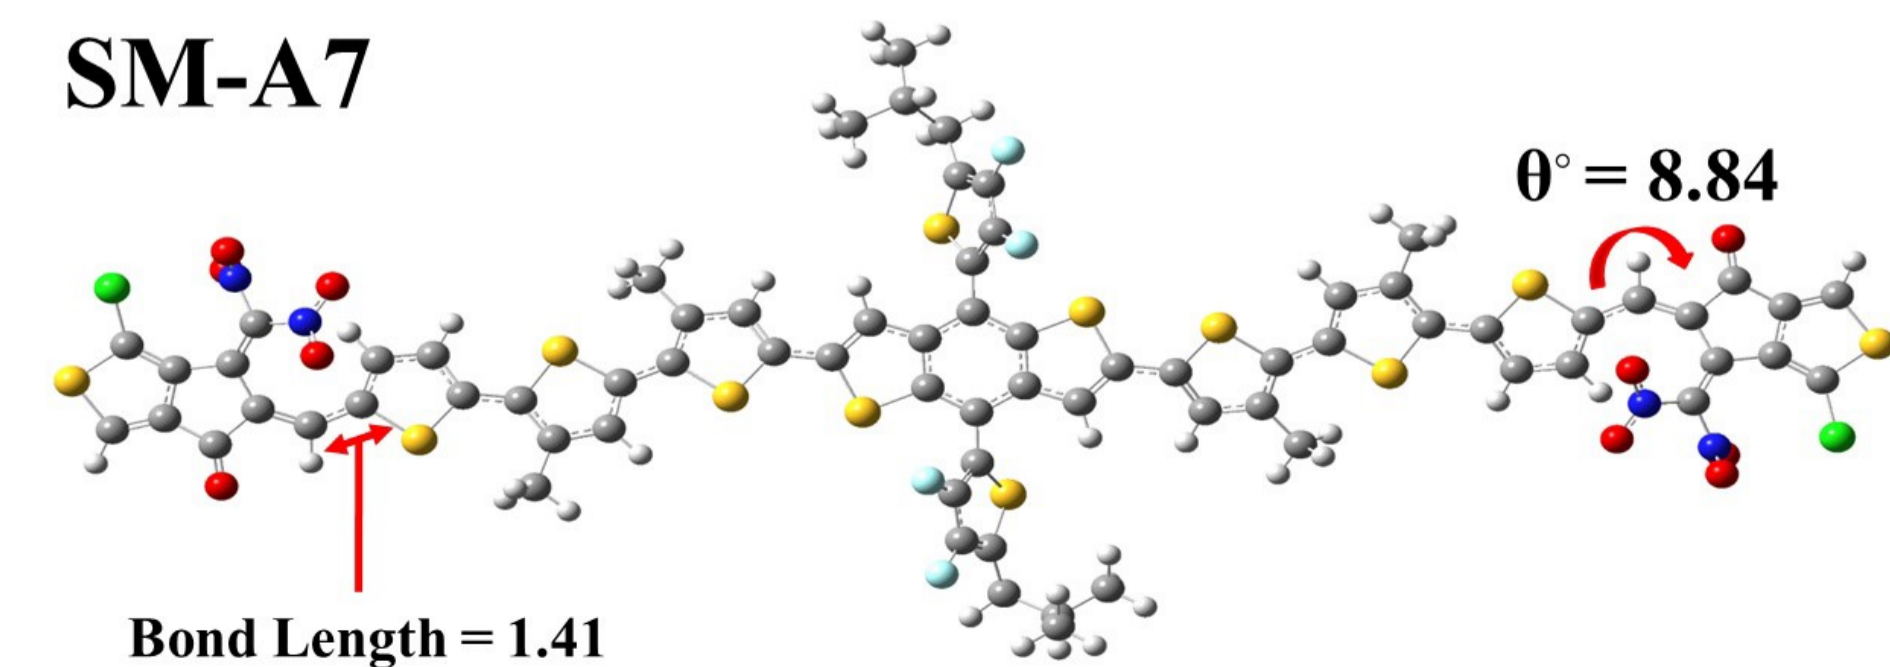

**SM-A8**

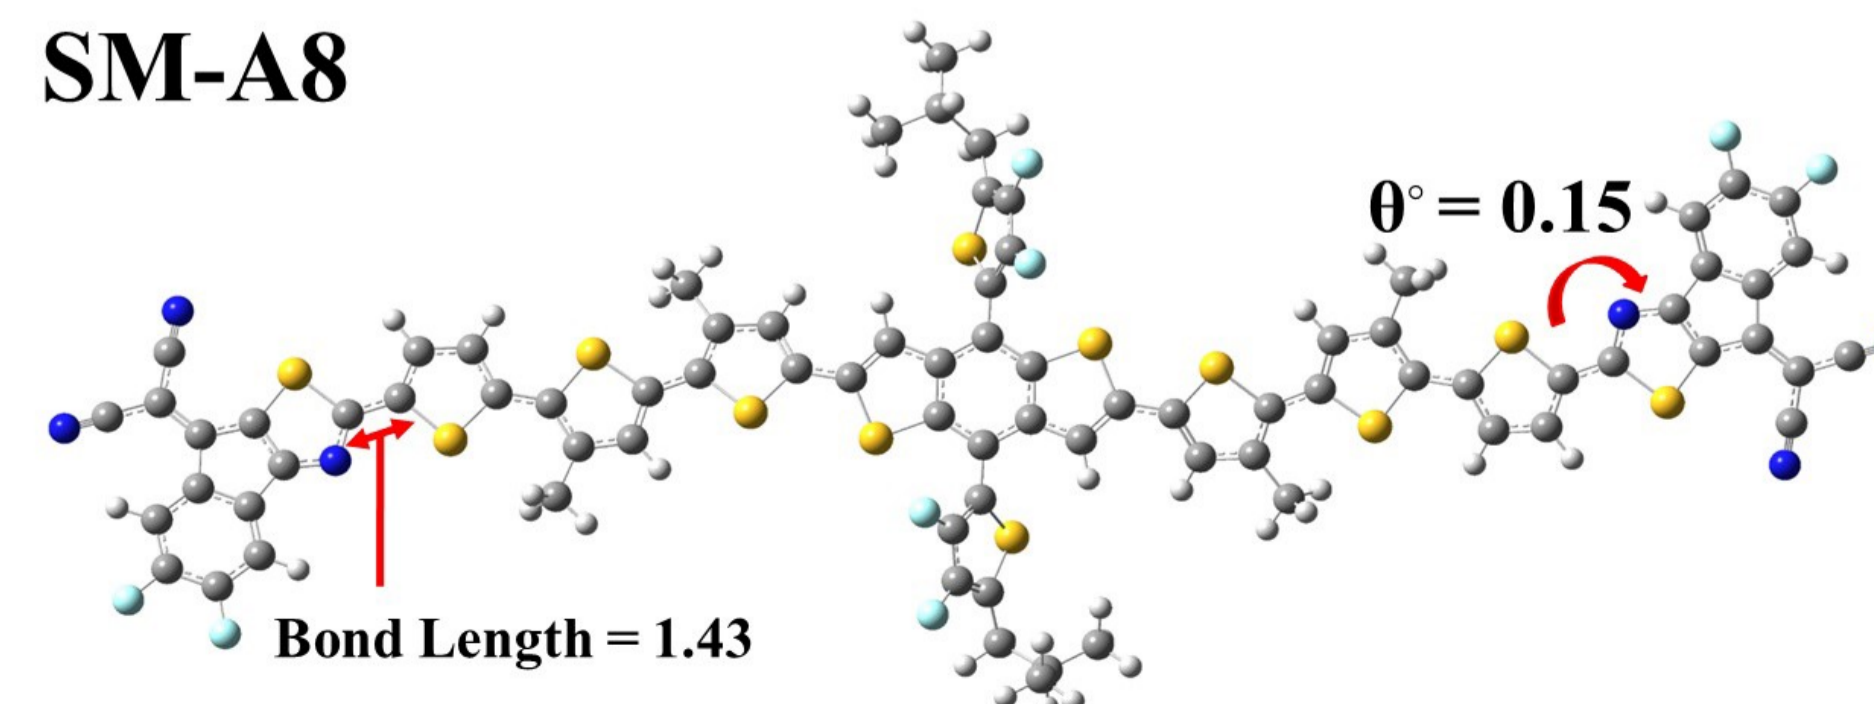

Supplement: d5na01002k4.pdf [file d5na01002k4.pdf]
